# Supplementary material for: Controllable growth of two-dimensional SnSe2 flakes with screw dislocations and fractal structures
Source: Royal Society of Chemistry journal article supplement (doi:10.1039/d0ce00819b), 2020-01-01
Supplement: d0ce00819b1.pdf [file d0ce00819b1.pdf]

## Supporting Information for

# Controllable growth of two-dimensional SnSe<sub>2</sub> flakes with screw dislocations and fractal structures

*Chang Wang, ‡<sup>a</sup> Huixia Yang, ‡<sup>a</sup> Qiaochu Wang,<sup>a</sup> Lu Qiao,<sup>a</sup> Xianglin Peng,<sup>a</sup> Ji Li,<sup>a</sup> Junfeng Han,<sup>ab</sup> Qinsheng Wang,<sup>ab</sup> Xiang Li,<sup>ab</sup> Zhiwei Wang,<sup>ab</sup> Junxi Duan<sup>ab</sup> and Wende Xiao<sup>\*ab</sup>*

<sup>a</sup>Key laboratory of advanced optoelectronic quantum architecture and measurement, ministry of education, School of Physics, Beijing Institute of Technology, Beijing, 100081, China

<sup>b</sup>Micronano Center, Beijing Key Lab of Nanophotonics and Ultrafine Optoelectronic Systems, Beijing Institute of Technology, Beijing, 100081, China.

‡These authors contributed equally.

\*E-mail: wdxiao@bit.edu.cn (W.D.X.).

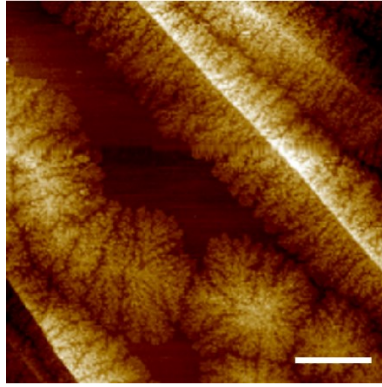

**Fig. S1** AFM image of SnSe<sub>2</sub> flakes grown on HOPG with substrate temperature of 100 °C. Scale bar, 300 nm.

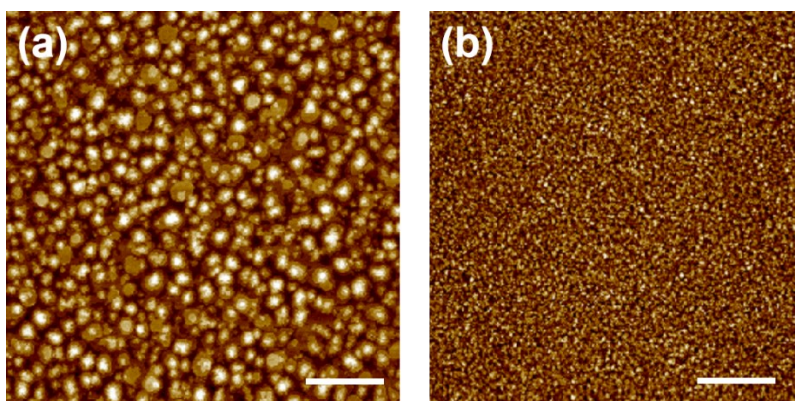

**Fig. S2** AFM images of SnSe<sub>2</sub> flakes grown on mica substrates with substrate temperature of 180 °C (a) and 160 °C (b), respectively. Scale bars, 200 nm.
